# Supplementary material for: A Botybirnavirus Isolated from Alternaria tenuissima Confers Hypervirulence and Decreased Sensitivity of Its Host Fungus to Difenoconazole
Source: Viruses. 2022 Sep 21;14(10):2093. doi: 10.3390/v14102093 (PMC9611228; doi:10.3390/v14102093)
Supplement: Supplementary file 1 [file viruses-14-02093-s001.zip › Table S1.pdf]

**Table S1.** Primers used for reverse transcription-quantitative polymerase chain reaction (RT-qPCR) analysis of differentially expressed genes (DEGs) identified in the RNA sequencing (RNA-seq) data.

| Gene name | Primer name | Sequence (5'-3')        |
|-----------|-------------|-------------------------|
| At-g8804  | g8804-1F    | ATCTTCAATGCGGATGGCG     |
|           | g8804-1R    | GGAGCGAGTTGGTAGAGTGGTT  |
| At-g911   | g911-1F     | CTGGGCGAATCAAAGACTGC    |
|           | g911-1R     | TTCCGAACCTCCAATGGTAAA   |
| At-g1250  | g1250-1F    | CATTTTGACGGTGAGTTGGC    |
|           | g1250-1R    | CAGCAGATAGAAGGGAAGCATT  |
| At-g4632  | g4632-1F    | CGCTTTTACCTCTTCGCCATA   |
|           | g4632-1R    | CCAGTCTGCTTCGCCTTCC     |
| At-g1754  | g1754-1F    | CACAATACTGTCCAATCAGGGTC |
|           | g1754-1R    | GTGTAGGAGTGCGATGAGAAGA  |
| At-g7816  | g7816-1F    | AAATGCTCGCCTTCACCTG     |
|           | g7816-1R    | AGACCCTTGCCCTTGTTCC     |
| At-g4584  | g4584-1F    | ATTGAAGAGGAGGGTATTGCG   |
|           | g4584-1R    | CGTCACCAGGGTTCCAGTTAG   |
| At-g8103  | g8103-1F    | AGATGACCCCGAAAACCCC     |
|           | g8103-1R    | AGATGACCCCGAAAACCCC     |
| At-g3039  | g3039-1F    | AACATAACGAGCGGCAATAAC   |
|           | g3039-1R    | TTGAGTGCTGGAAGGAACATAG  |
| At-g4660  | g4660-1F    | CAGGGCGTTCTTAGCGATGT    |
|           | g4660-1R    | GGTGCGTATGTTTCTTGGAGG   |
| At-g11265 | g11265-1F   | CGCTCAGGTCGTCAAGGAA     |
|           | g11265-1R   | ACTGTTGGTGCTCGGGGTC     |
| Histone 3 | H3-1a       | ACTAAGCAGACCGCCCGCAGG   |
|           | H3-1b       | GCGGGCGAGCTGGATGTCCTT   |
