# Supplementary material for: A Botybirnavirus Isolated from Alternaria tenuissima Confers Hypervirulence and Decreased Sensitivity of Its Host Fungus to Difenoconazole
Source: Viruses. 2022 Sep 21;14(10):2093. doi: 10.3390/v14102093 (PMC9611228; doi:10.3390/v14102093)
Supplement: Supplementary file 1 [file viruses-14-02093-s001.zip › Table S2.pdf]

**Table S2.** Gene Ontology (GO) annotation of differentially expressed genes (DEGs) identified in the comparison between *Alternaria tenuissima* strains TJ-NH-51S-4 and TJ-NH-51S-4-VF (False discovery rate <0.05).

| Term_type          | GO_accession | Description                                   | Number of<br>Up-regulated genes | Number of<br>Down-regulated genes |
|--------------------|--------------|-----------------------------------------------|---------------------------------|-----------------------------------|
| Biological process | GO:0000003   | Reproduction                                  | 2                               | 1                                 |
| Biological process | GO:0008152   | Metabolic process                             | 59                              | 96                                |
| Biological process | GO:0009987   | Cellular process                              | 34                              | 32                                |
| Biological process | GO:0022414   | Reproductive process                          | 2                               | 1                                 |
| Biological process | GO:0023052   | Signaling                                     | 3                               | 0                                 |
| Biological process | GO:0032502   | Developmental process                         | 1                               | 0                                 |
| Biological process | GO:0040007   | Growth                                        | 0                               | 1                                 |
| Biological process | GO:0044699   | Single-organism process                       | 47                              | 78                                |
| Biological process | GO:0050896   | Response to stimulus                          | 9                               | 3                                 |
| Biological process | GO:0051179   | Localization                                  | 38                              | 35                                |
| Biological process | GO:0051704   | Multi-organism process                        | 2                               | 1                                 |
| Biological process | GO:0065007   | Biological regulation                         | 16                              | 8                                 |
| Biological process | GO:0071840   | Cellular component organization or biogenesis | 7                               | 8                                 |
| Biological process | GO:0098754   | Detoxification                                | 2                               | 2                                 |

|                    |            |                                                    |    |     |
|--------------------|------------|----------------------------------------------------|----|-----|
| Cellular component | GO:0005576 | Extracellular region                               | 0  | 2   |
| Cellular component | GO:0005623 | Cell                                               | 15 | 19  |
| Cellular component | GO:0016020 | Membrane                                           | 77 | 91  |
| Cellular component | GO:0031974 | Membrane-enclosed lumen                            | 1  | 2   |
| Cellular component | GO:0032991 | Macromolecular complex                             | 5  | 5   |
| Cellular component | GO:0043226 | Organelle                                          | 10 | 18  |
| Cellular component | GO:0044215 | Other organism                                     | 6  | 4   |
| Cellular component | GO:0044217 | Other organism part                                | 6  | 4   |
| Cellular component | GO:0044422 | Organelle part                                     | 3  | 9   |
| Cellular component | GO:0044425 | Membrane part                                      | 74 | 88  |
| Cellular component | GO:0044464 | Cell part                                          | 15 | 19  |
| Cellular component | GO:0003700 | Nucleic acid binding transcription factor activity | 8  | 4   |
| Cellular component | GO:0003824 | Catalytic activity                                 | 71 | 114 |
| Molecular function | GO:0005198 | Structural molecule activity                       | 2  | 0   |
| Molecular function | GO:0005215 | Transporter activity                               | 28 | 31  |
| Molecular function | GO:0060090 | Binding                                            | 59 | 58  |
| Molecular function | GO:0016209 | Antioxidant activity                               | 2  | 2   |

|                    |            |                              |   |   |
|--------------------|------------|------------------------------|---|---|
| Molecular function | GO:0098772 | Molecular function regulator | 2 | 0 |
|--------------------|------------|------------------------------|---|---|

---
