# Supplementary material for: A Botybirnavirus Isolated from Alternaria tenuissima Confers Hypervirulence and Decreased Sensitivity of Its Host Fungus to Difenoconazole
Source: Viruses. 2022 Sep 21;14(10):2093. doi: 10.3390/v14102093 (PMC9611228; doi:10.3390/v14102093)
Supplement: Supplementary file 1 [file viruses-14-02093-s001.zip › Table S3.pdf]

**Table S3.** Kyoto Encyclopedia of Genes and Genomes (KEGG) annotation of differentially expressed genes (DEGs) identified in the comparison between *Alternaria tenuissima* strains TJ-NH-51S-4 and TJ-NH-51S-4-VF.

| GO_accession | Description                                 | Number of Up-regulated genes | Number of Down-regulated genes |
|--------------|---------------------------------------------|------------------------------|--------------------------------|
| ko04113      | Meiosis-yeast                               | 6                            | 6                              |
| ko04146      | Peroxisome                                  | 2                            | 2                              |
| ko04111      | Cell cycle-yeast                            | 1                            | 3                              |
| ko04011      | MAPK signaling pathway-yeast                | 1                            | 2                              |
| ko02010      | ABC transporters                            | 5                            | 3                              |
| ko03010      | Ribosome                                    | 1                            | 1                              |
| ko00970      | Aminoacyl-tRNA biosynthesis                 | 0                            | 2                              |
| ko04141      | Protein processing in endoplasmic reticulum | 0                            | 2                              |
| ko03040      | Spliceosome                                 | 1                            | 1                              |
| ko03440      | Homologous recombination                    | 2                            | 1                              |
| ko03008      | Ribosome biogenesis in eukaryotes           | 1                            | 3                              |
| ko00380      | Tryptophan metabolism                       | 3                            | 8                              |
| ko00073      | Cutin, suberine, and wax biosynthesis       | 1                            | 1                              |
| ko00220      | Arginine biosynthesis                       | 1                            | 1                              |
| ko00310      | Lysine degradation                          | 1                            | 1                              |
| ko00052      | Galactose metabolism                        | 1                            | 1                              |
| ko01210      | 2-Oxocarboxylic acid metabolism             | 0                            | 2                              |
| ko00460      | Cyanoamino acid metabolism                  | 2                            | 1                              |
| ko00511      | Other glycan degradation                    | 2                            | 1                              |
| ko01212      | Fatty acid metabolism                       | 1                            | 2                              |
| ko00750      | Vitamin B6 metabolism                       | 0                            | 3                              |
| ko00010      | Glycolysis/Gluconeogenesis                  | 1                            | 2                              |
| ko00270      | Cysteine and methionine metabolism          | 0                            | 3                              |

|         |                                              |   |   |
|---------|----------------------------------------------|---|---|
| ko00061 | Fatty acid biosynthesis                      | 1 | 2 |
| ko00650 | Butanoate metabolism                         | 0 | 3 |
| ko00051 | Fructose and mannose metabolism              | 0 | 3 |
| ko00410 | Beta-Alanine metabolism                      | 0 | 3 |
| ko00910 | Nitrogen metabolism                          | 1 | 2 |
| ko00480 | Glutathione metabolism                       | 0 | 3 |
| ko00620 | Pyruvate metabolism                          | 2 | 2 |
| ko00760 | Nicotinate and nicotinamide metabolism       | 2 | 2 |
| ko00240 | Pyrimidine metabolism                        | 2 | 2 |
| ko00640 | Propanoate metabolism                        | 1 | 3 |
| ko00740 | Riboflavin metabolism                        | 1 | 3 |
| ko01200 | Carbon metabolism                            | 0 | 5 |
| ko01230 | Biosynthesis of amino acids                  | 1 | 4 |
| ko00561 | Glycerolipid metabolism                      | 1 | 4 |
| ko00520 | Amino sugar and nucleotide sugar metabolism  | 2 | 3 |
| ko00040 | Pentose and glucuronate interconversions     | 0 | 6 |
| ko00330 | Arginine and proline metabolism              | 2 | 4 |
| ko00564 | Glycerophospholipid metabolism               | 1 | 5 |
| ko00350 | Tyrosine metabolism                          | 2 | 5 |
| ko00250 | Alanine, aspartate, and glutamate metabolism | 4 | 3 |
| ko00230 | Purine metabolism                            | 6 | 1 |
| ko00360 | Phenylalanine metabolism                     | 1 | 6 |

---
