# Supplementary material for: A Botybirnavirus Isolated from Alternaria tenuissima Confers Hypervirulence and Decreased Sensitivity of Its Host Fungus to Difenoconazole
Source: Viruses. 2022 Sep 21;14(10):2093. doi: 10.3390/v14102093 (PMC9611228; doi:10.3390/v14102093)
Supplement: Supplementary file 1 [file viruses-14-02093-s001.zip › Table S4.pdf]

**Table S4.** The Log<sub>2</sub>fold change in differentially expressed genes (DEGs) related to amino acid metabolism in *Alternaria tenuissima* strain TJ-NH-51S-4, relative to *A. tenuissima* strain TJ-NH-51S-4-VF, and their annotation [RefSeq non-redundant proteins (NR) and protein family database (Pfam)].

| Gene_ID  | NR description                                                 | Pfam description                                     | Regulation model | Log <sub>2</sub> Fold Change |
|----------|----------------------------------------------------------------|------------------------------------------------------|------------------|------------------------------|
| At-g2462 | Acyl-CoA N-acyltransferase                                     | Acetyltransferase (GNAT) family                      | up               | 2.2967                       |
| At-g3645 | Di-copper center-containing protein                            | Common central domain of tyrosinase                  | up               | 1.8394                       |
| At-g5228 | Glutamate dehydrogenase                                        | Glutamate/Leucine/Phenylalanine/Valine dehydrogenase | up               | 1.6350                       |
| At-g8060 | Glutamine--fructose-6-phosphate aminotransferase [isomerizing] | SIS domain                                           | up               | 1.3150                       |
| At-g1037 | Glutaryl-CoA dehydrogenase                                     | Acyl-CoA dehydrogenase, C-terminal domain            | up               | 1.2688                       |
| At-g6163 | L-asparaginase 2-4                                             | Asparaginase, N-terminal                             | up               | 1.1375                       |
| At-g9680 | Glutamate decarboxylase                                        | Pyridoxal-dependent decarboxylase conserved domain   | down             | -2.3412                      |
| At-g765  | Phosphoesterase-like protein                                   | Phosphoesterase family                               | down             | -2.1685                      |
| At-g1621 | Glutamate decarboxylase                                        | Pyridoxal-dependent decarboxylase conserved domain   | down             | -1.7040                      |
| At-g4968 | Alcohol dehydrogenase 2                                        | Alcohol dehydrogenase GroES-like domain              | down             | -1.1130                      |
