# Supplementary material for: A Botybirnavirus Isolated from Alternaria tenuissima Confers Hypervirulence and Decreased Sensitivity of Its Host Fungus to Difenoconazole
Source: Viruses. 2022 Sep 21;14(10):2093. doi: 10.3390/v14102093 (PMC9611228; doi:10.3390/v14102093)
Supplement: Supplementary file 1 [file viruses-14-02093-s001.zip › Table S5.pdf]

**Table S5.** Validation of the expressed change ratio [Log<sub>2</sub>FoldChange, relative to *Alternaria tenuissima* strain TJ-NH-51S-4-VF] obtained in the RNA sequencing (RNA-seq) data using reverse transcription-quantitative polymerase chain reaction (RT-qPCR). Listed genes are differentially expressed genes (DEGs) related to cytochrome P450, drug resistance, ATP-binding cassette transporter (ABC), and major facilitator superfamily (MFS) in *A. tenuissima* strain TJ-NH-51S-4 as annotated in RefSeq non-redundant proteins (NR) and protein family (Pfam) databases. Eleven DEGs were selected for the RT-qPCR validation of the RNA-seq data.

| Gene_ID   | NR description                                 | Pfam description | Regulation model | RNA-seq (Log <sub>2</sub> Fold Change) <sup>a</sup> | qRT-PCR (2 <sup>-ΔΔct</sup> ) |             |
|-----------|------------------------------------------------|------------------|------------------|-----------------------------------------------------|-------------------------------|-------------|
|           |                                                |                  |                  |                                                     | TJ-NH-51S-4-VF                | TJ-NH-51S-4 |
| At-g911   | Cytochrome                                     | Cytochrome P450  | up               | 1.7289                                              | 1.6420                        | 4.9130      |
| At-g11265 | Cytochrome P450 sterol 14α-demethylase (CYP51) | Cytochrome P450  | up               | 1.5392                                              | 1.0913                        | 2.7809      |
| At-g8804  | Cytochrome P450 family protein                 | Cytochrome P450  | up               | 1.2978                                              | 1.0390                        | 2.5480      |
| At-g7231  | Cytochrome P450 family protein                 | Cytochrome P450  | down             | -2.1232                                             | — <sup>b</sup>                | —           |
| At-g1833  | Cytochrome P450 family protein                 | Cytochrome P450  | down             | -1.9325                                             | —                             | —           |
| At-g1560  | Cytochrome P450 52A12                          | Cytochrome P450  | down             | -1.8548                                             | —                             | —           |
| At-g5685  | Cytochrome P450 family protein                 | Cytochrome P450  | down             | -1.6715                                             | —                             | —           |
| At-g1880  | Cytochrome P450 family protein                 | Cytochrome P450  | down             | -1.6154                                             | —                             | —           |

|           |                                                           |                                         |      |         |        |        |
|-----------|-----------------------------------------------------------|-----------------------------------------|------|---------|--------|--------|
| At-g10737 | Cytochrome P450 family protein                            | Cytochrome P450                         | down | -1.5629 | —      | —      |
| At-g610   | Cytochrome P450 phenylacetate<br>hydroxylase-like protein | Cytochrome P450                         | down | -1.3853 | —      | —      |
| At-g3369  | Cytochrome P450 3A17                                      | Cytochrome P450                         | down | -1.3084 | —      | —      |
| At-g3404  | Cytochrome P450 76C3                                      | Cytochrome P450                         | down | -1.0458 | —      | —      |
| At-g9548  | Azole resistance protein                                  | Major facilitator superfamily           | down | -4.4061 | —      | —      |
| At-g9347  | Aminotriazole resistance protein                          | Major facilitator superfamily           | down | -2.9289 | —      | —      |
| At-g5065  | Multidrug resistance protein                              | ABC transporter<br>transmembrane region | down | -1.7886 | —      | —      |
| At-g1754  | ATP-binding cassette transporter                          | ABC-2 type transporter                  | down | -1.9174 | 1.0125 | 0.2708 |
| At-g6376  | Putative transporter                                      | Major facilitator superfamily           | up   | 1.5736  | —      | —      |
| At-g2640  | MFS general substrate transporter                         | Major facilitator superfamily           | up   | 1.2894  | —      | —      |
| At-g8103  | Membrane transporter                                      | Major facilitator superfamily           | down | -3.3514 | 1.0144 | 0.0645 |
| At-g11728 | Putative transporter                                      | Major facilitator superfamily           | down | -2.9717 | —      | —      |
| At-g3039  | MFS general substrate transporter                         | Major facilitator superfamily           | down | -2.6997 | 1.0726 | 0.0753 |
| At-g4660  | MFS general substrate transporter                         | Major facilitator superfamily           | down | -2.6934 | 1.0074 | 0.2227 |
| At-g9794  | MFS general substrate transporter                         | Major facilitator superfamily           | down | -1.9477 | —      | —      |

|           |                                   |                               |      |         |        |        |
|-----------|-----------------------------------|-------------------------------|------|---------|--------|--------|
| At-g10416 | MFS general substrate transporter | Major facilitator superfamily | down | -1.8821 | —      | —      |
| At-g5043  | MFS general substrate transporter | Major facilitator superfamily | down | -1.4775 | —      | —      |
| At-g2973  | Putative transporter              | Major facilitator superfamily | down | -1.1134 | —      | —      |
| At-g2452  | Siderophore iron transporter      | --                            | up   | 3.4328  | —      | —      |
| At-g1250  | Siderophore iron transporter      | Major facilitator superfamily | up   | 2.1654  | 1.0136 | 4.1880 |
| At-g7202  | Siderophore iron transporter      | Major facilitator superfamily | up   | 2.0584  | —      | —      |
| At-g4632  | Siderophore iron transporter 1    | Major facilitator superfamily | up   | 1.6176  | 1.1762 | 2.8569 |
| At-g7816  | Phosphate permease                | Phosphate transporter family  | up   | 3.3835  | 1.0514 | 3.5930 |
| At-g4584  | Thioredoxin-like protein          | AhpC/TSA family               | up   | 2.0237  | 1.0064 | 6.4723 |

<sup>a</sup> The fold change values were originated from the data of RNA-seq which were evaluated using false discovery rate  $P < 0.05$  and from the data of RT- qPCR.

<sup>b</sup> The symbol ‘—’ showed that the DEGs were not chosen for validation of the data of RNA-seq.

]
